# Supplementary material
Source: PubMed Central journal article supplement (PMC5029170)
Supplement: ismej2015250x5.pdf [file ismej2015250x5.pdf]

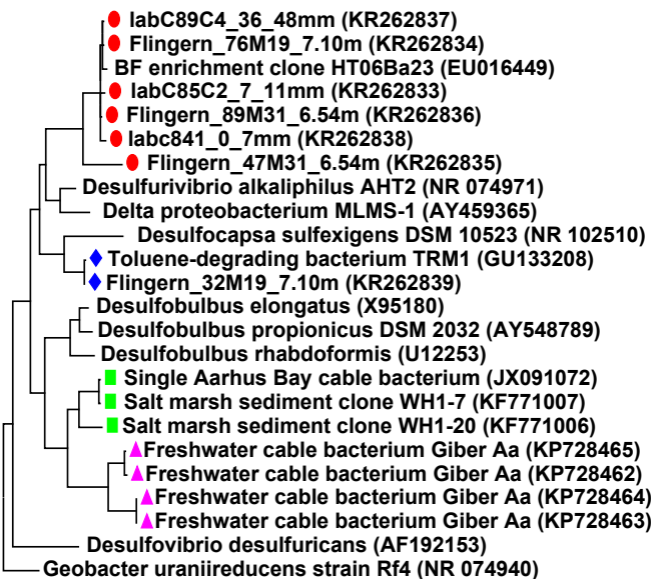

0.1
